# Supplementary material for: Zooming In: SCREAM at 100 m Using Regional Refinement over the San Francisco Bay Area
Source: Copernicus journal article supplement (doi:10.5194/egusphere-2025-2223), 2025-06-06
Supplement: Supplementary file [file egusphere-2025-2223-AC2-supplement.pdf]

This manuscript describes a unique model configuration of a global model run with regional refinement down to 100m. It is generally well written and appropriate for GMD. The work does a lot of detailed discussion of the software engineering and configuration of the model at the front, and then a simulation performance description at the back. I think a lot of the software discussion could be usefully made a supplement or appendix to improve readability of the manuscript and make it a good description of model simulations. This should be publishable in GMD with some minor revisions as I note below.

Thank you for your careful reading and insightful suggestions, as well as for your recognition of the significance of our work! In response to your comments, we have revised the figures and the main text. Five figures have been updated, four figures and two tables have been added in the main text.

General Points:

1. I appreciate the step by step description in the first sections of how the model is configured, but I think this is too detailed for the main text and could be put in an appendix.

Thank you for your valuable feedback! As the primary goal of this study is to provide a first proof of concept and document the associated challenges, rather than to pursue scaled-up deployment or a comprehensive evaluation at this stage, the methodology forms the core of our contribution. The key objective of this work is to document the process in full detail to facilitate reproducibility for other interested users. Recognizing that many readers may not be interested in highly technical details, we have reorganized the Methods section. Detailed content has been moved into deeper-level subsections, and we have added two summary sentences at the start of the Methods:

“The section includes all necessary steps and technical details that made these simulations possible, organized by level of detail. Readers primarily interested in results and discussion may choose to skip the tertiary subsections.”

2. There are some inconsistencies in the figure labeling, numbering and referencing that need to be corrected as noted below.

Thank you for pointing this out! We have revised the text accordingly based on the suggestions provided below.

3. It would be nice to make a few more comments about turbulence across scales. It is hinted at in a few places (with some contradictions that need to be clarified as noted below), but clarification would be good. Specifically (as the text notes): the conventional

wisdom says at 100m you need 3D turbulence, but you are using a unified bulk closure with SHOC and this 'seems to work'. That's great, but can you show a figure of turbulence or KE or something that does a bit more to convince a skeptic about it? That would be a great addition.

Thanks for your nice suggestions! Here contains two distinct concepts.

First, the conventional view is that the gray zone – defined as the regime in which the energy-containing turbulence scale is comparable to the scale of the spatial filter – necessitates the use of 3D turbulence parameterizations. This is distinct from the LES regime, which is able to resolve the dominant turbulent structures. The gray zone is typically between the upper bound of LES and the lower bound of mesoscale models. Mesoscale models do not require explicit turbulence resolution because the dominant fluxes arise from eddy ensemble-averaged statistics, which are largely governed by mean gradients in the vertical. On the other hand, within high-resolution LES, the role of tensor diffusion schemes is limited: most turbulent fluxes are resolved, and subfilter-scale processes contribute minimally; so long as energy is positively removed from the resolved scales at the filter level, which a simple scalar eddy diffusivity often achieves effectively (Wyngaard, 2004). If the simulation is run at 800 m horizontal resolution, it is best to use a 3D turbulence version of SHOC. Indeed, even at resolutions as fine as 100 m or finer, developing a 3D SHOC implementation will not be wasted effort, as many studies suggest the filter scale should be interpreted as the effective resolution.

Second, SHOC can be used at LES-scale resolutions without explicit tuning largely due to its built-in scale awareness. That is, as the grid spacing ( $dx$ ) decreases, the contributions from SGS TKE and SGS fluxes become smaller, while resolved TKE and fluxes become increasingly dominant. In contrast, a turbulence scheme that lacks scale awareness (i.e., one that exerts a similar influence at  $dx = 100$  m and  $dx = 3$  km) would require manual adjustment of parameters or a deliberate weakening of its influence. In the simplest case, this might involve disabling SHOC entirely at  $dx = 100$  m + nudging outside the high-resolution domain.

The first point is conceptual, whether a 3D turbulence implementation would significantly improve simulations at 100 m resolution remains to be verified once such a scheme is implemented into SCREAM. Notably, 100 m sits close to the lower boundary of the gray zone, but the exact transition between modeling regimes can vary in practice, depending on the dominant turbulent length scale which might be case specific. The second point, however, can be demonstrated directly. Although we didn't output resolved TKE, we have SHOC TKE, moisture flux/variance,  $w$  variance, and the third moment of  $w$ . As shown in the added Figs. 18 and 19 (also shown below), the

magnitudes of SGS terms are substantially smaller in BA-100m simulations compared to CA-3km. Note that the shading colorbars differ in each variable to better highlight the spatial structure; the absolute values can be compared through the line plots on the right side of each shading plot.

We have revised the structure of the Results section accordingly. The new analysis of SGS TKE/flux/variance has been added in a separate subsection of “Sub-grid-scale flux” after the in situ evaluation. We also have clarified the concept of the gray zone:

“\subsection{Sub-grid-scale flux}

Building on the resolution sensitivity study of DP-SCREAM in \cite{Bogenschutz2023}, SCREAM exhibits characteristics of a scale aware model. As horizontal resolution increases, the partitioning between SGS and resolved turbulence diminishes. This scale awareness, inherent to the SHOC parameterization \cite{Bogenschutz\_Krueger2013}, enables SCREAM to operate effectively at 100 m resolution without the need for parameter tuning. Specifically, Fig. 9 and Fig. 16 in \cite{Bogenschutz2023} show that in the marine stratocumulus case, maritime shallow cumulus case, and mixed-phase Arctic stratocumulus case, as the horizontal grid spacing  $\Delta x$  decreases, the contribution of SGS moisture flux becomes smaller while the resolved flux becomes increasingly dominant. In the 100 m DP-SCREAM simulations, above 0.2 km, the proportion of SGS moisture flux is negligible, and the resolved flux is nearly unity.

In our simulations, although we did not output high-frequency resolved moisture flux or TKE, Fig.~\ref{SHOCtimeplevStorm2008} and Fig.~\ref{SHOCtimeplevStratocumulus2023} shows substantial reductions in SGS TKE, moisture flux/variance, \emph{w} variance, and the third moment of \emph{w} in the BA-100m simulations compared to the CA-3km simulations. For clarity, the plotted ranges in these figures differ between the two resolutions, with the CA-3km values being much larger.

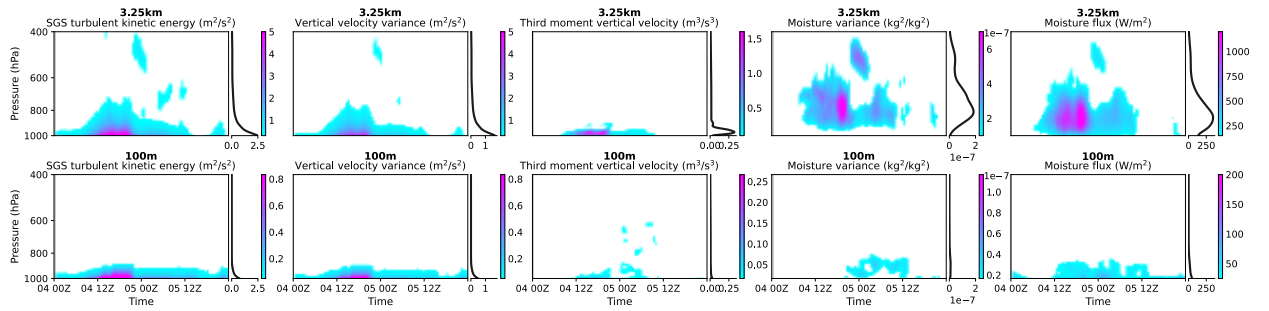

**Figure 18.** Simulated Sub-grid-scale (SGS) variables in the 3.25 km California RRM (top) and 100 m Bay Area RRM (bottom) during the Storm2008 event. From left to right: TKE, vertical velocity variance, third-moment vertical velocity, moisture variance, and moisture flux. Each panel consists of a time–evolution shading plot on the left and a vertical profile averaged over the simulation period on the right. For clarity, the colorbars differ between the 3.25 km and 100 m simulations, with the former being much larger.

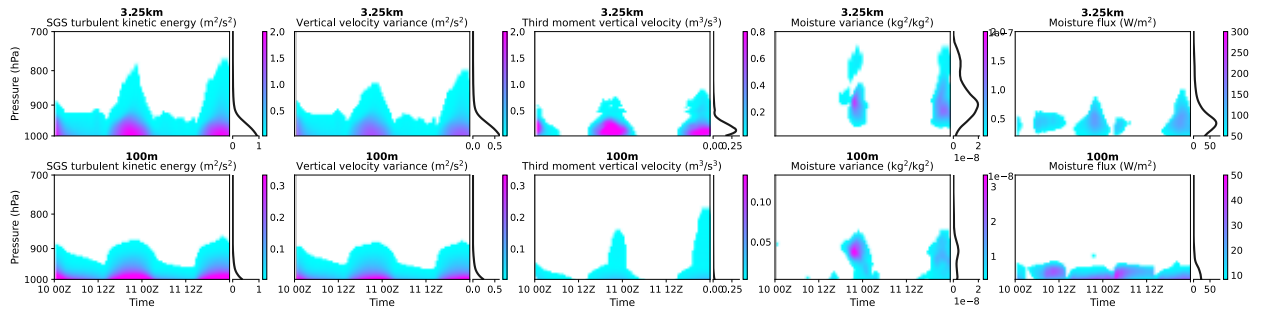

**Figure 19.** Same as Fig. 18 but for the Stratocumulus2023 event.

At 100 m resolution, simulations are close to, but largely below, the turbulence gray zone, where the grid spacing becomes comparable to the dominant eddy scale. The gray zone typically spans the transition from mesoscale models, which rely on ensemble-averaged vertical fluxes, to LES, where most turbulent motions are explicitly resolved and subgrid closures play only a minor dissipative role \citep{Wyngaard2004}. In this transitional regime, subgrid transport is best treated with 3D turbulence schemes that represent the full stress tensor \citep[e.g.,]{Wyngaard2004,Chow2019,Honnert2020}, whereas SHOC currently parameterizes only vertical mixing. Thus, at coarser resolutions such as 800 m, a 3D implementation of SHOC would likely be beneficial. At 100 m, near the lower edge of the gray zone, the need for 3D turbulence remains uncertain and case-dependent, pending the implementation and testing of such a scheme in SCREAM.”

Specific Comments:



Page 4, L124: so except where noted, this is SCREAMv0 FORTRAN code? Would be good to be explicit about this.

This entire paragraph refers to the SCREAMv1 C++ codebase (EAMxx), whereas other parts of the paper are based on the SCREAMv0 Fortran version. We have added this clarification to the sentence:

“When this study began, we only had CPU resources, EAMxx was not yet fully operational, and all simulation results presented in this paper were conducted using the SCREAMv0 Fortran version. ”

Page 5, L136: this is not a ‘nest’ however right? Please be clear because ‘level’ might imply there are multiple grids underneath.

Yes, it is not a nested grid, but a seamless single-layer mesh. We have changed “level-1 refinement” to “first-order refinement”, and “second layer of refinement” to “second-order refinement”.

Page 6, L149: same refined grid correct?

Yes, the land and atmospheric physical grids are identical. In CA-3km land, the resolution transitions from global 100 km to 3 km over California. In BA-100m land, it transitions from global 100 km to 800 m over California, and further down to 100 m over the Bay Area.

Page 7, L186: so what is the actual resolution of the topography you can resolve? It seems like you go from 500m → 800m and then down to 100m? Is there more information or is this smoothed at 800m. I assume there is higher resolution topography than 500m available for Northern California?

Although high-resolution DEMs with resolutions at O(1)m are available for California, there are two limitations. First, since a RRM is a subset of a global high-resolution grid, it is most efficient and sustainable to build topography from a global high-resolution DEM. This ensures that new RRM can be generated for any region of interest without requiring users to rerun the entire topography workflow each time (a process that would otherwise be redundant, cumbersome, and resource-intensive). Second, the current toolchain requires a global lat-lon DEM (referred to as “terr\_latlon\_glb”). Even if high-resolution DEMs are available for specific regions, they still need to be stitched and interpolated into a global DEM of matching resolution. As a result, the size of terr\_latlon\_glb remains extremely large, and unless the toolchain is upgraded, the

similar OOM issues will persist. One of the key conclusions of this study is thus the importance of the toolchain upgrades. For topography specifically, this would ideally involve developing MPI-enabled tools and simplifying the mapping algorithms.

Page 8, L203: I appreciate the step by step description, but I think this is too detailed for the main text and could be put in an appendix. The source of the topo data should be identified, then the method can be a page in an appendix.

Thank you again for your valuable suggestions! As noted above, we have reorganized the structure of the Methods section by moving technical details into deeper-level subsections (i.e., under tertiary headings), and we have added a reading guide at the end of the Introduction. The source of the raw DEM data for topography generation has also been described in detail in the Methods section.

Page 8, L214: unclear what the difference is between you two 100m test runs. How was the simulation without the 'steep topographic gradients' specified? Also, a bit too much info perhaps, and maybe just note that smoothing is important. But doesn't it affect the height of the topography?

This refers to two separate points.

First, the statement "a sensitivity test using a finer 100 m mesh – which did not include the steep topographic gradients present in the RRM configuration examined in this study" refers to an earlier test conducted prior to the current simulations. In that test, we designed a different 100 m mesh with a smaller domain that was shifted eastward, excluding many of the mountainous regions present in the current BA-100m configuration, hence the reference to the absence of "steep topographic gradients". This earlier simulation used the default smoothing level and other default dynamical core settings, and it successfully ran for one hour. This preliminary test served as supporting evidence that the model instability encountered in the current BA-100m run was likely related to the topography, especially due to the inability to generate sufficiently high-resolution RRM topography, which led to overly steep slopes at the mountain grid boundaries.

Second, regarding the two smoothing configurations tested in the current BA-100m simulations: while it is true that smoothing affects the height of the topography, the difference between 6 and 12 iterations of smoothing is not apparent. Notably, the E3SM v2 topography toolchain recommends 12 smoothing passes as standard practice.

The figure below (Fig. R1.1) compares the topography after 6 (left) and 12 (right) smoothing iterations. Visually, the difference is minimal:

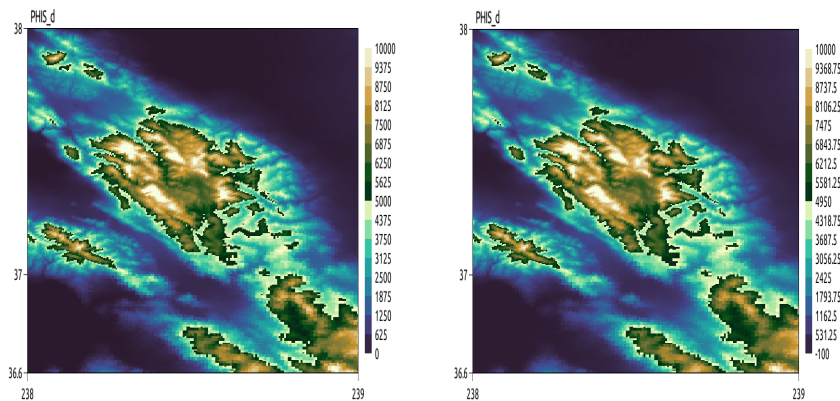

R1.1 BA-100m topography generated using 6 (left) and 12 (right) smoothing iterations.

The Methods section has been reorganized, with the technical details moved under tertiary-level headings.

Page 10, L239: so what timestep does an LES model with 100m resolution typically use? This seems VERY short (I'm guessing the LES is more like 1sec). So what does that say about the quality of the dynamics or the utility of this configuration? Seems like you could get quite a speed up (e.g. 20x) if you got the timestep to 0.5s)....

The dynamical core timestep was set to one-tenth of the default value, and the physics timestep was set to 1 second. This configuration reflects underlying issues with the topography, which were somewhat expected. The hypothesis that topo-related problems are contributing to the instability is supported by the comparison between the current BA-100m and the “without the steep topographic gradients” 100m mesh as mentioned in the previous question. In more detail, due to OOM limitations, we were unable to use more realistic high-resolution topography – such as the 250 m global dataset or the 100 m regional data (which would require stitching and interpolation with other regions). As a result, the model dx exceeds the effective dx of RRM topo on 800 m cubed-sphere, which can lead to unrealistic blocky mountain phenomenon with flat centers and overly steep edges. These artificial slopes can introduce excessive high-wavenumber energy into the simulation. Once the current toolchain limitations are resolved, we expect the dynamical core timestep to return to its default value, allowing the simulation to run approximately 10 times faster.

Page 10, L242: This paragraph states both “one simulated hour per wall clock hour” (i.e. 1SDPD) then “0.16 SDPD”. Please clarify.

Thanks for pointing this out! The first sentence was a typo; the second sentence is correct. The intended statement was “one simulated hour per 6.4 wall-clock hours”. This has now been corrected.

Page 12, L269: The 100m and 3.25km are two different simulations right? What are the number of grid cells and the timestep in the 3.25km simulation? I assume this is just the 100m grid without the additional ‘level’ or refinement?

Yes, these are two separate simulations. The 3.25 km configuration includes 67,872 physical grid cells, with a dynamical core timestep of 9.375 seconds and a physics timestep of 72 seconds. As shown in Fig. 1, the 100 m grid is based on a first-order of 800 m California refinement.

If the concern is whether the differences between the 100 m and 3.25 km simulations might be primarily driven by the surrounding 800 m region outside the Bay Area – rather than by the 100 m mesh itself – then the possibility is very low. One line of evidence comes from previous studies: the AR evaluation paper by Bogenschutz et al. (2024) conducted a detailed comparison between 3.25 km and 800 m CARRM simulations; Zhang et al. (2025) evaluated multi-year energy generation at both resolutions; and Zhang et al. (2024) assessed the resolution sensitivity at 800 m vs. 3.25 km on simulating extreme floods in northern China, where complex terrain also plays a key role. These studies found only marginal improvements at 800 m compared to 3.25 km. A second line of evidence is shown in Fig. 11 of this study: the Stockton station, which lies just outside the 100 m mesh and is located the 800 m region, exhibits much smaller improvements than other stations located within the 100 m mesh.

#### References:

1. Bogenschutz, P. A., Zhang, J., Tang, Q., & Cameron-Smith, P. (2024). Atmospheric-river-induced precipitation in California as simulated by the regionally refined Simple Convective Resolving E3SM Atmosphere Model (SCREAM) Version 0. *Geoscientific Model Development*, 17(18), 7029-7050.
2. Zhang, J., Caldwell, P. M., Bogenschutz, P. A., Ullrich, P. A., Bader, D. C., Duan, S., & Beydoun, H. (2024). Through the lens of a kilometer-scale climate model: 2023 Jing-Jin-Ji flood under climate change. *Authorea Preprints*.
3. Zhang, J., Golaz, J., Signorotti, M. V., Lee, H., Bogenschutz, P., Monteagudo, M., Ullrich, P. A., Arthur, R. S., Po-Chedley, S., Cameron-smith, P., & Watson, J.: Simulation of wind and solar energy generation over California with E3SM SCREAM regionally refined models at 3.25 km and 800 m resolutions, *EGUsphere* [preprint], <https://doi.org/10.5194/egusphere-2025-3947>, 2025.

Page 15, L324: what is the timestep of the land model on this grid? And also while I am thinking about it, what is the timestep of the land model when run interactively?

In the land-only simulations, the land model timestep is 1800 seconds, consistent with the 6-hourly atmospheric forcing from ERA5. In Zhang et al. (2024), we tested a shorter timestep of 150 seconds and found it had negligible impact on the land initial conditions. In the atm-land coupled simulations, the land model runs with the same timestep as the atmosphere's physics timestep, which is 75 seconds.

We have added two sentences here:

“The land model uses a timestep of 1800 seconds in the land-only simulations, consistent with the 6-hourly atmospheric forcing from ERA5. In the atmosphere-land coupled simulations, the land model runs with the same timestep as the atmospheric physics, which is 75 seconds.”

Page 17, L367: I assume the soundings vary in time and space as they go up as well (different model grid boxes with height)? Or does this not matter.

The raw sounding data were vertically interpolated to the reference pressure levels of SCREAM's 128 reference pressure levels, using a log(pressure) to log(pressure) interpolation method. A description of the pressure-level interpolation for the IGRA data has been updated in the following sentence:

“The IGRA soundings were vertically interpolated using a log(pressure)-log(pressure) method to SCREAM's 128-layer reference pressure levels, which are defined by midpoint pressures ranging from 998.5 hPa near the surface to 2.6 hPa at the model top.”

Page 18, L368: are you using a fixed pressure for each level? Shouldn't it vary with surface pressure and not using just the reference pressure? I assume you have a 3D pressure field from the model. The errors for the storm case (surface pressure well below 1000hPa) would be considerable in the lower troposphere.

The IGRA data include pressure records, so they can be directly interpolated to fixed pressure levels. For the model data, pressures at each level are computed from the surface pressure PS and the hybrid coordinate coefficients (hyam, hybm, hyai, hybi, P0), and thus can also be interpolated to the same fixed pressure levels. This procedure

inherently accounts for variations in PS. The purpose of this interpolation is to facilitate plotting, since MetPy's SkewT function requires pressure as the vertical coordinate.

We have added the following clarification:

“For sounding comparisons, model data were interpolated to the same reference pressure levels, computed from the simulated surface pressure and hybrid sigma-pressure coefficients.”

Page 20, L396: what vertical level are you referring to for the Venturi effect.

Thank you for bringing this up! Please refer to Video A1: around the midpoint of the simulation, following the passage of the AR front, a narrow band of vertical motion develops from north to south on the lee side of the coastal ranges. This feature is most pronounced at 850 hPa. Initially, we noted that it differed notably from the mountain wave pattern observed prior to the frontal passage. However, upon further inspection of U850 and V850, we found that the wind speed enhancement extended far downstream from the gap exits (whereas gap winds typically peak near the exit region). Moreover, due to the lack of vertical profile of wind output, we could not confirm whether the flow weakened with height (as the topo gap widens). As a result, we decided to remove the original description of this feature.

Page 20, L399: again, what level? Where is this to be seen on Figure 7? Might need panel labels (A-L).

Sorry for the confusion. The phenomenon also appears in Video V1, beginning around the last third of the simulation and persisting until roughly the final one-sixth.

Because the videos contain far more information than can be fully conveyed in a static figure, it is difficult to capture this feature comprehensively in the main-text plots. We have therefore added more explanation in the text and again directed readers to the videos provided in the Appendix:

“During the final third of the simulation, multiple suspected cold pools propagate successively inland. Their gust fronts are evident in the 850 hPa vertical velocity field. We recommend readers consult the animations in Video Supplement, which contains far more information than can be captured in static snapshots.”

Page 24, L437: For fig 11, is the timeseries coarse because it's a single observation? If so, then maybe showing the variation or average around the time of the observation from the model would be useful. E.g. If it is a point measurement, the model temporal variability could be within that envelope.

The timeseries is coarse because the time sampling in this observation product is rough. We can implement what you suggested for Fig. 11, since the sampling frequency of Meteomanz (6 h) and ISD (irregular, preprocessed to 3 h) is much lower than the model's output frequency (5 min). We decided not to apply this to Tides and Currents data as its sampling frequency (6 min) is already comparable to that of the model.

While revising this figure, we also noticed that the model data had previously been averaged in time to match the obs time sampling, whereas the observations were instantaneous measurements. When the observational frequency is low, this mismatch can introduce a systematic phase lag in the diurnal cycle. In the revised manuscript, the model time sampling has therefore been switched to instantaneous output. This change improved the agreement of the diurnal cycle with Meteomanz observations in both simulations, and also yielded better consistency between the Meteomanz and ISD time series.

Thanks for the nice suggestion! We have updated the method description and the timeseries figures for Meteomanz and ISD accordingly:

"The model's 5 min instantaneous outputs were resampled to match the observational time sampling. For Meteomanz and ISD, we extracted instantaneous values aligned with observation times and calculated the standard deviation within each observational window. For Tides and Currents, the 5 min outputs were averaged to 6 min intervals."



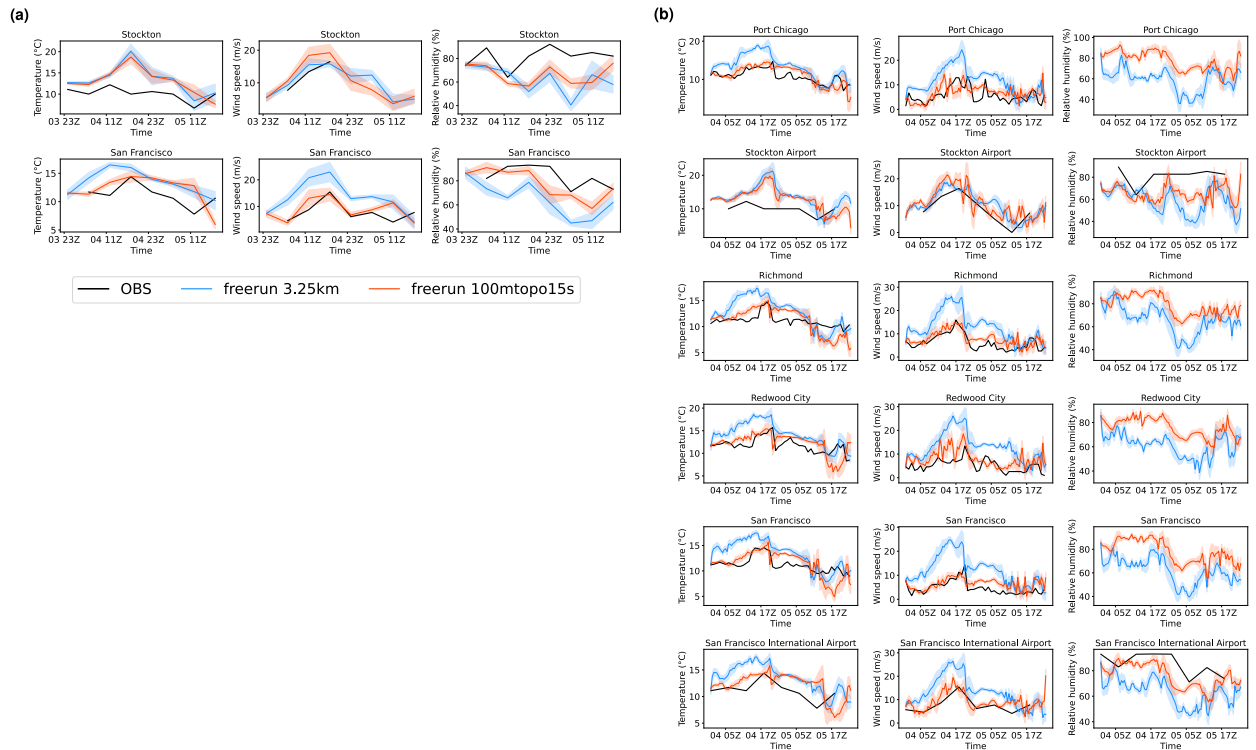

**Figure 11.** (a) Time series at each station for the Storm2008 event, with black, blue, and orange lines representing Meteomanz observations, the 3.25 km California SCREAM-RRM simulation, and the 100 m Bay Area SCREAM-RRM simulation, respectively. (b) Same as (a), but for ISD observations. From left to right, the columns show near-surface air temperature, wind speed, and relative humidity. The bold line shows model output resampled from 5 min resolution to match the observational intervals as instantaneous values; shading denotes the standard deviation within each observational window.

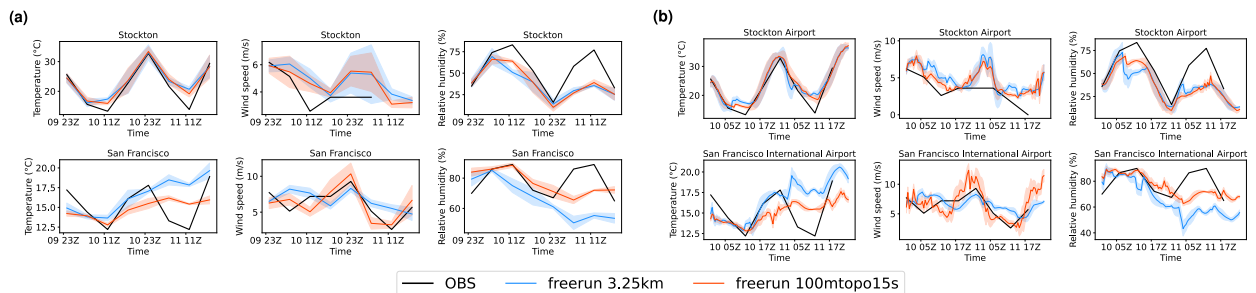

**Figure 16.** Same as Fig. 12 but for the Stratocumulus2023 event.

Page 26, L448: where is wind speed shown? Fig 11 and 12 are temperature and surface pressure.

The middle columns of Fig. 11 (Meteomanz, ISD) and Fig. 12 (Tides and Currents) show the wind speed.

Page 28, L471: reduces the wind bias from the 3km simulation? (Please be explicit).

Thanks! We have added “of the 3.25 km simulation”.

Page 28, L474: is the improvement specifically around orography?

This seems to be a wording issue.. what we intend to express is that, for the San Francisco Bay Area – a region that *as a whole* is characterized by complex terrain – precipitation processes related to orography may be better represented.

We have updated it to “with local orographic features in complex terrain”.

Page 28, L476: but increased turbulence (TKE) noted above would increase mixing and damp accumulation of cooler air masses.

What we intended to emphasize is that when more TKE is explicitly resolved, small-scale turbulent mixing processes are represented more realistically. However, more effective mixing does not necessarily imply that mesoscale phenomena like cold pools would be damped. A possibly unrelated but thought-provoking analogy is the sensitivity of aggregation to numerical filtering discussed in Silvestri (2004), which showed that SAM, without any scale-selective filter, contains much more energy at small scales and exhibits stronger aggregation (although these two phenomena are not necessarily causally related). In other words, enhanced small-scale TKE may also facilitate upscale energy transfer to the mesoscale, while, our current understanding is very limited, and we view this only as speculation.

#### References:

1. Silvestri, L., Saraceni, M., & Bongioannini Cerlini, P. (2024). Numerical diffusion and turbulent mixing in convective self-aggregation. *Journal of Advances in Modeling Earth Systems*, 16(5), e2023MS004151.

Page 28, L478: reference figure 13? Or similar for this case.

Yes, we have added the figure reference here.

Page 29, L487: Fig 14: is this a correlation over space? Can you put any variability on it? Say by correlating in space at different times?

Fig. 14 shows station-level metrics, e.g., the average correlation between observed and modeled timeseries at each station. It is difficult add variability at different times to this

figure, because both Meteomanz and ISD data are relatively coarse. If correlations were computed at different times, the sample size within each subgroup would be too small (with the number of stations on the order of  $O(10)$ ).

Nevertheless, we later performed 10 ensemble runs for each case using CA-3km, which allows us to add ensemble variability to the CA-3km bar in this figure. The updated metrics for the two events are shown below. The CA-3km simulation exhibits a non-trivial ensemble spread for the Storm2008 case, while the Stratocumulus2023 case shows almost no spread. More details on the CA-3km ensemble are provided in our response to Reviewer #2, where it is evident that the ensemble spread for Storm2008 begins to grow at the 34th simulation hour, while the moisture transport and overall precipitation patterns are highly robust.

The summary metrics plots have been updated in the main text:

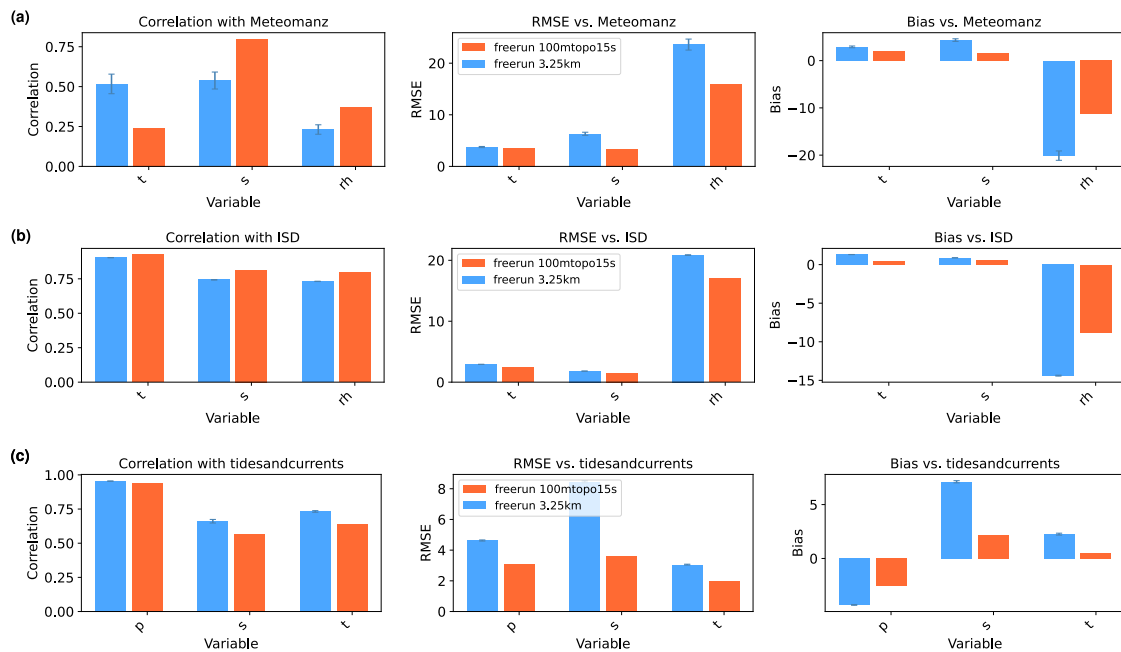

**Figure 10.** Skill scores for the Storm2008 event are shown for near-surface temperature (t), wind speed (s), relative humidity (rh), and surface pressure (p). These are compared against observations from (a) Meteomanz, (b) ISD, and (c) Tides and Currents, and presented as three overall metrics: Pearson correlation coefficient (left), root-mean-square error (RMSE, middle), and bias (right). The blue and orange bars indicate simulation results from the 3.25 km California SCREAM-RRM and the 100 m Bay Area SCREAM-RRM, respectively. The ensemble spread in the 3.25 km simulation is represented by standard deviation bars.

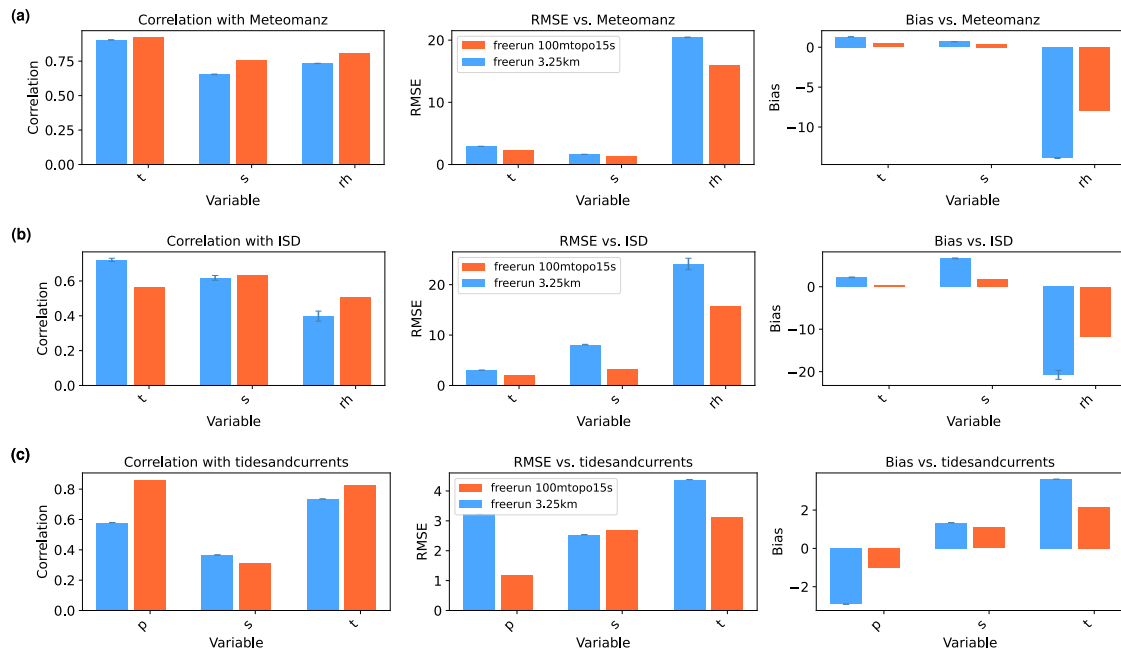

**Figure 14.** Same as Fig. 10 but for the Stratocumulus2023 event.

Page 29, L488: Do you mean Figure 15 here? If not, you refer to figure 16 before figure 15.

Thank you for pointing this out! We have corrected the order accordingly.

Page 31, L510: but these discrepancies would be expected right? If you averaged the radiosonde over the SCREAM or ERA5 levels you probably would not see the features right?

This is somewhat expected, but just to note that we interpolated both the IGRA soundings and SCREAM output to the same pressure levels for plotting, since MetPy's SkewT requires pressure as the vertical coordinate.

Page 32, L525: is it really turbulence or just that the larger scale pattern is easier to initialize correctly and has less forcing than the other cases?

The initial conditions are the same in the CA-3km and BA-100m simulations, but the 100 m simulation shows improvement, which at least suggests that the improvement is not due to initialization? As you noted in your later comment regarding kinetic energy spectra (please see the response below), our supplementary analysis confirms the expected behavior: in the 100 m simulation, the kinetic energy is generally well resolved at scales smaller than 1 km.

Page 32, L531: can you show this partitioning?

As shown in our earlier response, we did not output resolved TKE. Fortunately, however, we did output SHOC TKE, moisture flux/variance,  $w$  variance, and the third moment of  $w$ . As shown in the added Fig. 18 and Fig. 19, the magnitudes of the SGS terms are much smaller in the BA-100m simulation compared to CA-3km. This similar partitioning is well documented in Fig. 9 and Fig. 16 of Bogenschutz (2023), which evaluated the SGS/resolved partitioning in a marine stratocumulus case, a maritime shallow cumulus case, and a mixed-phase Arctic stratocumulus case.

References:

1. Bogenschutz, P. A., Eldred, C., & Caldwell, P. M. (2023). Horizontal resolution sensitivity of the simple convection-permitting E3SM atmosphere model in a doubly-periodic configuration. *Journal of Advances in Modeling Earth Systems*, 15(7), e2022MS003466.

Page 32, L533: Your statement about avoiding the turbulence gray zone is contradicted by the statement below that turbulence should be modeled in 3D. What are the potential errors in this assumption?

This statement was intended to clarify that the gray zone (defined as scales larger than LES and smaller than mesoscale) requires a 3D turbulence scheme. Thus, at  $dx=100m$ , SHOC should largely avoid the gray zone issue (in contrast, at 800 m resolution a 3D turbulence scheme would be best added). As shown in our earlier response, we have revised this section in the main text accordingly.

Page 33, L554: You state that SHOC can smoothly transition without tuning. Is there a way to show this? KE spectra at different resolutions? It would be nice to show.

Based on this great comment from you and Reviewer #2, we have added KE and  $w$  spectra analyses. Note that spectra analysis is not a direct test of scale awareness, whereas the marked differences in SGS TKE/flux/variance between the CA-3km and BA-100m simulations (Fig. 18 and Fig. 19 in the updated manuscript) provide a more straightforward demonstration. As grid spacing decreases, the role of SGS terms naturally diminishes, which is precisely the manifestation of scale awareness, i.e., “transitioning smoothly from kilometer to LES scales without tuning”. The scale awareness of SCREAM was first quantified in Bogenschutz (2023)’s Fig. 9 and Fig. 16.

The added energy spectra analysis in the revised manuscript is as follows:

“\subsection{Energy spectra} → in Methods

For global models, spherical harmonics are a natural method for spectral decomposition, but they are not suitable for limited-area regional models and RRM. For regional outputs, Discrete Fourier Transforms (DFT) and Discrete Cosine Transforms (DCT) are commonly used. DFT requires detrending or windowing, while detrending can artificially remove large-scale gradients, and windowing can distort spectra for already periodic fields \citep{Errico1985, Denis2002}. DCT mirrors the field to ensure symmetry before applying a Fourier transform, and is reliable for fields with spectral slopes between  $-4$  and  $1$ . DCT was originally developed for digital image, audio, and video compression (e.g., JPEG), but it has also been used to diagnose energy spectra in numerical simulations \citep[e.g.,]{Denis2002, Selz2019, Prein2022}.

We used the `scipy.fft` package

(\url{https://docs.scipy.org/doc/scipy/tutorial/fft.html}, last access: 17 September 2025) for Discrete Cosine Transforms. Since we only output high-frequency relative vorticity, divergence, and  $\omega$  profiles, we computed rotational and divergent KE spectra as well as  $\omega$  spectra at every level using 10 min instantaneous outputs. The raw outputs were on the dynamical GLL grid; they were horizontally interpolated using the NCO-native first-order conservative algorithm to  $0.03^\circ$  (3.25 km California RRM) and  $0.001^\circ$  (100 m Bay Area RRM) over the small domain of the 100 m mesh (237.5E–238.5E, 37.3N–38.3N), and vertically interpolated to SCREAM’s 128 reference pressure levels using NCO’s default method. The two-dimensional spectra were projected onto the zonal and meridional directions, then averaged in time (from the 6th simulation hour to the end of the simulation) and in the vertical (within 100 hPa around 200, 500, and 850 hPa, respectively).

\subsection{Energy spectra} → in Results

Energy spectra provide a benchmark for evaluating the transition from large-scale quasi-2D motions to small-scale 3D turbulence. The canonical  $k^{-3}$  slope at synoptic scales and  $k^{-5/3}$  slope at mesoscale wavelengths \citep{Nastrom\_Gage1985} are widely used to assess effective resolution and numerical diffusion in atmospheric models \citep[e.g.,]{Skamarock2004, Jablonowski\_Williamson2011, Caldwell2021}. Numerous studies have examined KE spectra in global and regional models \citep[e.g.,]{Bierdel2012, Skamarock2014, Durran2017, Menchaca\_Durran2019, Prein2022, ZhangY2022,

Khairoutdinov2022, Silvestri2024}, with some studies have emphasized the rotational and divergent components \cite[e.g.,][]{Hamilton2008, BlažicaN2013, Selz2019}. Spectra of vertical velocity ( $w$ ) are also informative, as they emphasize divergent motions and typically peak at mesoscale wavelengths \citep{Bryan2003, Schumann2019}. Figures~\ref{spectraStorm2008}–\ref{spectraStratocumulus2023} show KE and  $w$  spectra for the Storm2008 and Stratocumulus2023 cases.



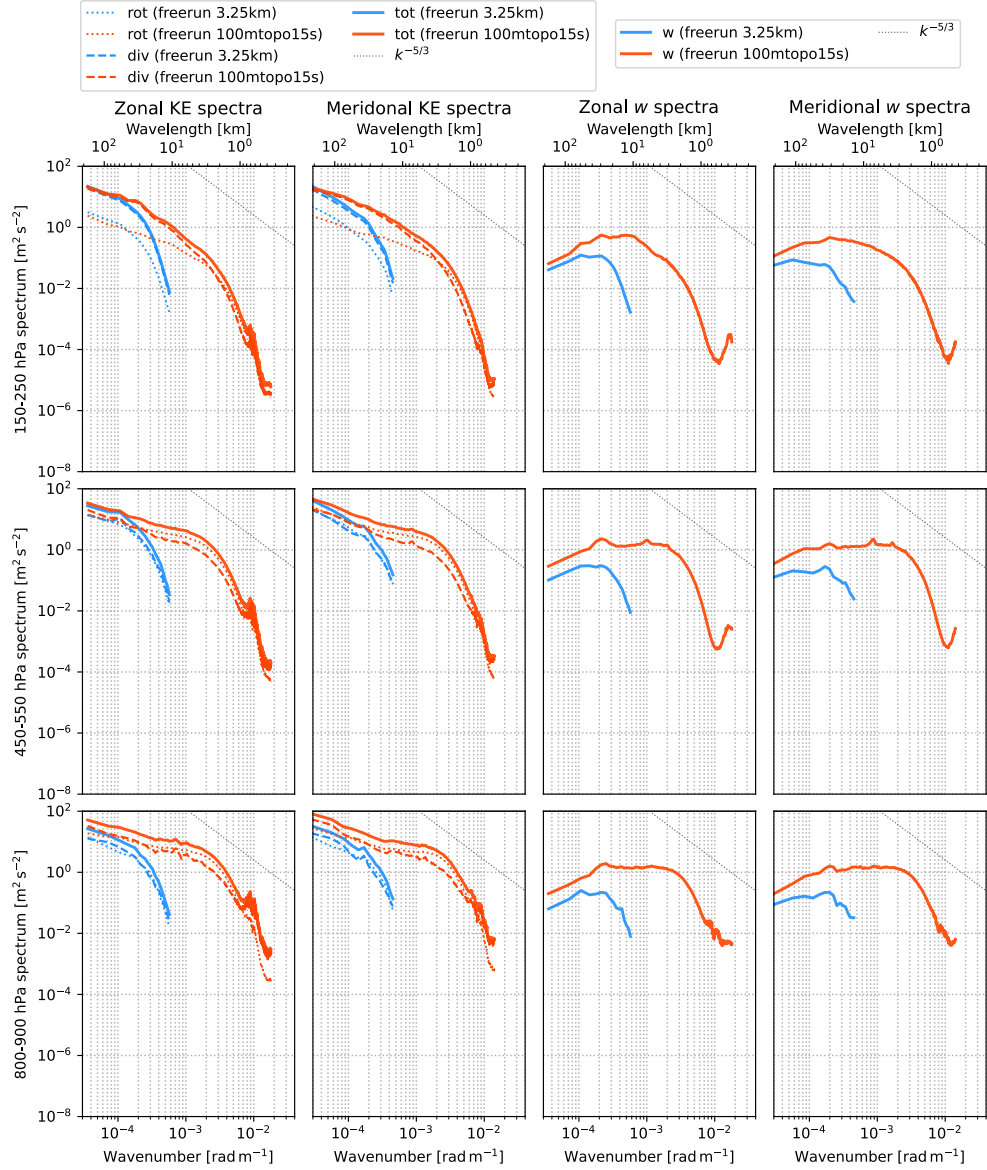

**Figure 20.** Energy spectra simulated by the 3.25 km California RRM (blue) and the 100 m Bay Area RRM (orangered) for the Storm2008 case. From left to right: zonal kinetic energy (KE), meridional KE, zonal vertical velocity ( $w$ ), and meridional  $w$  spectra. From top to bottom: averages centered at 200 hPa, 500 hPa, and 850 hPa, each using a 100 hPa vertical window. In the KE spectra, the total, rotational, and divergent components are shown as thick solid, thin dotted, and thin dashed lines, respectively. A reference  $k^{-5/3}$  slope line is shown in the top-right corner.

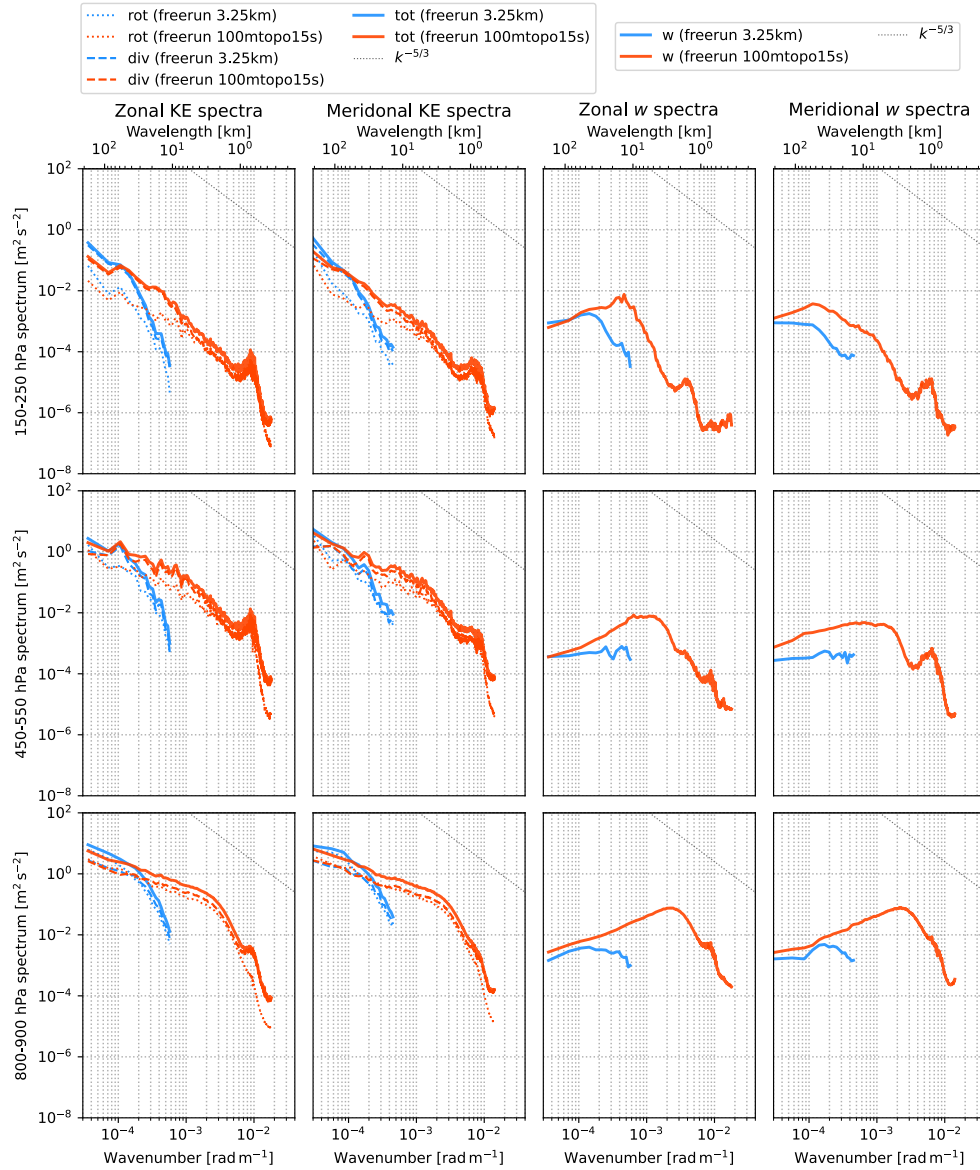

**Figure 21.** Same as Fig. 20 but for the Stratocumulus2023 event.

First, the CA-3km simulations roll off sooner than the global spectra in \cite{Caldwell2021}; however, we caution that the two differ in important ways (DCT over a region vs. spherical harmonics globally; two two-day events vs. 40-day statistics). For BA-100m, the effective resolution in Stratocumulus2023 is shorter than in Storm2008 if the roll-off standard is applied. However, within the mesoscale regime (10 km–100 m), the Storm2008 KE spectra flatten relative to  $k^{-5/3}$  before steepening again, which corresponds to the earlier roll-off. The mesoscale flattening of the KE spectra in this case may reflect a genuine accumulation of mesoscale energy, given that this was a record-breaking

extreme event. In both cases, it is robust that BA-100m contains much more small-scale energy than CA-3km.

A notable feature in both events is a sharp KE increase between 1 km and 500 m (approximately) in BA-100m. We suspect this results from the blocky mountain effect, caused by the mismatch between the 800 m cubed-sphere topography (the highest-resolution global dataset available) and the model's 100 m grid spacing. Toolchain memory limits prevented higher-resolution topography, so the effective topographic resolution lags behind the model  $\Delta x$ , producing unnaturally flat peaks and steep slopes. These slopes can generate excess high-wavenumber energy, consistent with the abrupt KE rise below 1 km. An alternative is contamination by inflow of coarser-resolution energy from the surrounding 800 m mesh via lateral boundaries. However, this is inconsistent with: 1) the effect being stronger in Stratocumulus2023 than in Storm2008, whereas boundary advection should amplify it in the latter; and 2) the 800 m mesh itself having an effective resolution of  $\sim 4.8$  km, with KE decaying rapidly beyond that, making a rise near 500 m hard to explain. To confirm the blocky mountain hypothesis, sensitivity tests with 100 m cubed-sphere topography are needed. To rule out lateral boundary effects, larger RRM domains need be tested [cf.] [Bogenschutz2024]. In either case, toolchain memory upgrades are essential.

The  $w$  spectra exhibit a mesoscale peak, consistent with [Bryan2003, Schumann2019], with a cutoff near 1–3 km in BA-100m. Below 1 km, the ratio of  $w$  to KE spectra approaches unity in Storm2008 but remains below one in Stratocumulus2023, except in the lower troposphere. The temporal evolution further shows rapid development of small- and mesoscale  $w$  spectra, which are well developed within the first simulation hour (not shown).

Overall, KE spectra vary substantially across these two events, reflecting the influence of different forcing mechanisms and dynamical regimes. This aligns with [Menchaca\_Durran2019] and [Selz2019], and does not support a universal mesoscale KE spectrum."

Page 33, L557: It's probably better to say that you ignore the turbulence gray zone problems and it seems to work in these cases. That's an interesting point (and useful). Again, would be nice to show a figure that illustrates this.

Thanks for asking this! We are indeed operating at a critical resolution, i.e., based on the criterion that determines whether a scale lies in the turbulence gray zone regime by comparing the energy-containing turbulence length scale and the spatial filter scale. When the two are of similar magnitude, a 3D turbulence scheme may be required (or more precisely, its added value becomes significant). Compared to Storm2008, where the energetic vortices are much larger in scale, the Stratocumulus2023 case lies closer to the gray zone boundary. Some papers suggest using effective resolution instead of nominal grid spacing to assess this. Of course, developing a 3D turbulence scheme would be beneficial, and once implemented, it will allow us to quantify whether its added value is substantial at 100 m resolution or not.

As noted earlier, we have already added the discussion in the subsection titled “Sub-grid-scale flux”.
